# Supplementary material for: Effects of Aging and Disease Conditions in Brain of Tumor-Bearing Mice: Evaluation of Purine DNA Damages and Fatty Acid Pool Changes
Source: MDPI journal article supplement (doi:10.3390/biom12081075), 2022-08-04
Supplement: s1 [file s1]

## Supporting Material

# Effects of Aging and Disease Conditions in Brain of Tumor-Bearing Mice: Evaluation of Purine DNA Damages and Fatty Acid Pool Changes

Marios G. Krokidis \*, Paraskevi Prasinou, Eleni K. Efthimiadou, Andrea Boari, Carla Ferreri and Chrysostomos Chatgililoglu \*

\* Correspondence: m.krokidis@inn.demokritos.gr (M.G.K.); chrys@isof.cnr.it (C.C.)

### List of Contents:

|                                  |          |
|----------------------------------|----------|
| Table S1 and Table S2            | page S2  |
| Figure S1, Table S3 and Table S4 | page S3  |
| Table S5 and Table S6            | page S4  |
| Table S7 and Table S8            | page S5  |
| Figure S2                        | page S6  |
| Table S9                         | page S7  |
| Table S10                        | page S8  |
| Table S11                        | page S9  |
| Table S12                        | page S10 |

**Table S1.** The levels (lesions/ $10^6$  nucleosides) of 5'R-cdG, 5'S-cdG, 5'R-cdA, 5'S-cdA, 8-oxo-dG and 8-oxo-dA in the brain tissues of control SCID, tumor-bearing SCID and normal Swiss mice, 4-weeks and 17-weeks old respectively (mean  $\pm$  standard deviation of six sample measurements). Part of this Table is included in Table 1.

|                   | <b>5'R-cdG</b>    | <b>5'R-cdA</b>    | <b>5'S-cdG</b>    | <b>5'S-cdA</b>    |
|-------------------|-------------------|-------------------|-------------------|-------------------|
| control 4w        | 0.176 $\pm$ 0.011 | 0.140 $\pm$ 0.016 | 0.205 $\pm$ 0.028 | 0.116 $\pm$ 0.014 |
| control 17w       | 0.179 $\pm$ 0.036 | 0.146 $\pm$ 0.019 | 0.211 $\pm$ 0.024 | 0.137 $\pm$ 0.012 |
| tumor-bearing 4w  | 0.185 $\pm$ 0.018 | 0.153 $\pm$ 0.014 | 0.213 $\pm$ 0.034 | 0.112 $\pm$ 0.014 |
| tumor-bearing 17w | 0.178 $\pm$ 0.031 | 0.140 $\pm$ 0.020 | 0.245 $\pm$ 0.025 | 0.136 $\pm$ 0.012 |
| normal 4w         | 0.159 $\pm$ 0.020 | 0.140 $\pm$ 0.023 | 0.213 $\pm$ 0.025 | 0.115 $\pm$ 0.010 |
| normal 17w        | 0.164 $\pm$ 0.030 | 0.128 $\pm$ 0.020 | 0.209 $\pm$ 0.022 | 0.117 $\pm$ 0.009 |

|                   | <b>8-oxo-dG</b>   | <b>8-oxo-dA</b>   |
|-------------------|-------------------|-------------------|
| control 4w        | 1.828 $\pm$ 0.183 | 0.202 $\pm$ 0.041 |
| control 17w       | 1.783 $\pm$ 0.208 | 0.201 $\pm$ 0.046 |
| tumor-bearing 4w  | 1.730 $\pm$ 0.276 | 0.201 $\pm$ 0.012 |
| tumor-bearing 17w | 1.903 $\pm$ 0.234 | 0.216 $\pm$ 0.046 |
| normal 4w         | 1.719 $\pm$ 0.159 | 0.184 $\pm$ 0.038 |
| normal 17w        | 1.638 $\pm$ 0.281 | 0.184 $\pm$ 0.020 |

**Table S2.** The  $p$  values for cPu and 8-oxo-Pu lesions obtained from the data of Table S1; control is the SCID mice without tumor and normal is the healthy Swiss mice.

|                                           | <b>5'R-cdG</b> | <b>5'R-cdA</b> | <b>5'S-cdG</b> | <b>5'S-cdA</b> | <b>8-oxo-dG</b> | <b>8-oxo-dA</b> |
|-------------------------------------------|----------------|----------------|----------------|----------------|-----------------|-----------------|
| control 4w vs.<br>control 17w             | 0.8513         | 0.5458         | 0.4729         | 0.0102*        | 0.6988          | 0.9740          |
| tumor-bearing 4w vs.<br>tumor-bearing 17w | 0.6827         | 0.4100         | 0.0354*        | 0.0342*        | 0.1493          | 0.7445          |
| control 4w vs.<br>tumor-bearing 4w        | 0.6241         | 0.4513         | 0.7234         | 0.6414         | 0.2097          | 0.6828          |
| control 17w vs.<br>tumor-bearing 17w      | 0.9723         | 0.3220         | 0.0370*        | 0.8887         | 0.4557          | 0.6194          |
| normal 4w vs.<br>normal 17w               | 0.5853         | 0.4522         | 0.5677         | 0.6718         | 0.4447          | 0.9712          |
| normal 4w vs control<br>4w                | 0.0885         | 0.9578         | 0.3060         | 0.8742         | 0.1858          | 0.4389          |
| normal 17w vs control<br>17w              | 0.5364         | 0.0716         | 0.8662         | 0.0049**       | 0.3871          | 0.2169          |

Statistically significant samples: \* <0.05 , \*\*<0.01

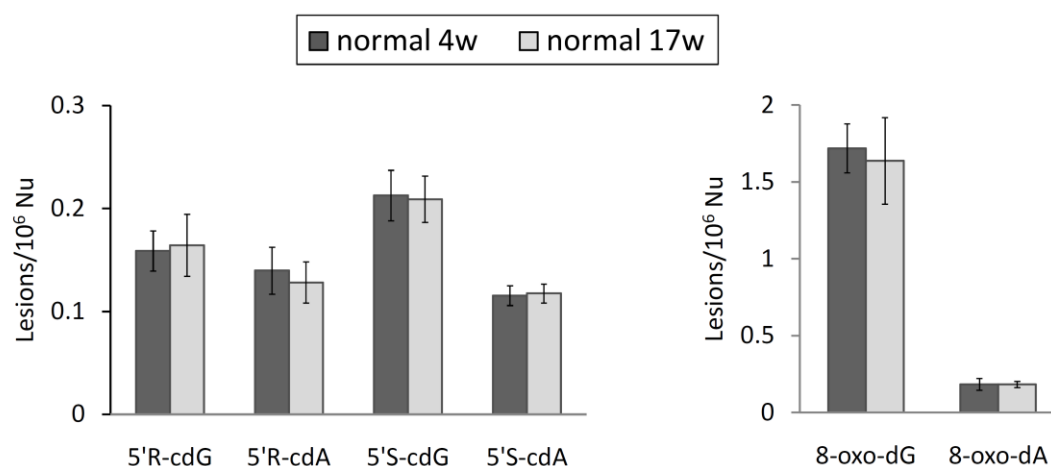

**Figure S1.** The levels (lesions/10<sup>6</sup> nucleosides) of cPu and 8-oxo-Pu in the brain tissues of 4-weeks and 17-weeks old normal mice. For specific values see Table S1.

**Table S3.** Total amount of cPu and 8-oxo-Pu (lesions/10<sup>6</sup> nucleosides) in the brain tissues of control SCID, tumor-bearing SCID and normal Swiss mice.

|                   | cPu         | 8-oxo-Pu    |
|-------------------|-------------|-------------|
| control 4w        | 0.637±0.049 | 2.030±0.188 |
| control 17w       | 0.674±0.053 | 1.984±0.206 |
| tumor-bearing 4w  | 0.662±0.053 | 1.931±0.241 |
| tumor-bearing 17w | 0.699±0.074 | 2.118±0.250 |
| normal 4w         | 0.626±0.068 | 1.903±0.192 |
| normal 17w        | 0.619±0.064 | 1.821±0.295 |

**Table S4.** The *p* values for the sum of cPu and 8-oxo-Pu lesions obtained from the data of Table S3.

|                                        | cPu    | 8-oxo-Pu |
|----------------------------------------|--------|----------|
| control 4w vs. control 17w             | 0.0633 | 0.6181   |
| tumor-bearing 4w vs. tumor-bearing 17w | 0.4808 | 0.1885   |
| control 4w vs. tumor-bearing 4w        | 0.1422 | 0.2579   |
| control 17w vs. tumor-bearing 17w      | 0.4914 | 0.4173   |
| normal 4w vs. normal 17w               | 0.7844 | 0.4419   |
| normal 4w vs control 4w                | 0.8457 | 0.1034   |
| normal 17w vs control 17w              | 0.1001 | 0.3095   |

**Table S5.** 5'R/5'S ratio in DNA isolated from the brain tissues of control SCID, tumor-bearing SCID and normal Swiss mice.

|                   | <b>R/S cdG</b> | <b>R/S cdA</b> |
|-------------------|----------------|----------------|
| control 4w        | 0.867±0.094    | 1.224±0.211    |
| control 17w       | 0.855±0.196    | 1.076±0.184    |
| tumor-bearing 4w  | 0.879±0.117    | 1.375±0.242    |
| tumor-bearing 17w | 0.731±0.106    | 1.031±0.158    |
| normal 4w         | 0.749±0.069    | 1.208±0.163    |
| normal 17w        | 0.788±0.127    | 1.088±0.122    |

**Table S6.** The *p* values for the 5'R/5'S ratio obtained from the data of Table S5.

|                                        | <b>R/S cdG</b> | <b>R/S cdA</b> |
|----------------------------------------|----------------|----------------|
| control 4w vs. control 17w             | 0.8926         | 0.2059         |
| tumor-bearing 4w vs. tumor-bearing 17w | 0.1108         | 0.0211*        |
| control 4w vs. tumor-bearing 4w        | 0.8457         | 0.2242         |
| control 17w vs. tumor-bearing 17w      | 0.0852         | 0.0688         |
| normal 4w vs. normal 17w               | 0.4216         | 0.3024         |
| normal 4w vs control 4w                | 0.0517         | 0.9068         |
| normal 17w vs control 17w              | 0.6203         | 0.8837         |

Statistically significant sample: \* <0.05

**Table S7.** The *p* values of fatty acids obtained from the comparison between brain tissues of control SCID and tumor-bearing SCID mice at 4 weeks and 17 weeks after conducting unpaired t-test (see Table 2).

| <b>FAME</b>             | <b>control<br/>4w vs.<br/>control 17w</b> | <b>tumor-bearing<br/>4w vs. tumor-<br/>bearing 17w</b> | <b>control<br/>4w vs. tumor-<br/>bearing 4w</b> | <b>control<br/>17w vs. tumor-<br/>bearing 17w</b> |
|-------------------------|-------------------------------------------|--------------------------------------------------------|-------------------------------------------------|---------------------------------------------------|
| 16:0                    | 0.0169*                                   | 0.0074**                                               | 0.1158                                          | 0.0073**                                          |
| 18:0                    | 0.9694                                    | 0.4005                                                 | 0.1411                                          | 0.0225*                                           |
| 9c-16:1                 | 0.6885                                    | 0.1797                                                 | 0.4756                                          | 0.4994                                            |
| 9c-18:1                 | 0.0990                                    | 0.4828                                                 | 0.0235*                                         | 0.0060**                                          |
| 11c-18:1                | 0.2337                                    | 0.9534                                                 | 0.1736                                          | 0.2379                                            |
| LNA (18:2- $\omega$ 6)  | 0.5710                                    | 0.1477                                                 | 0.4722                                          | 0.1642                                            |
| DGLA (20:3- $\omega$ 6) | 0.0713                                    | 0.1205                                                 | 0.0111*                                         | 0.3045                                            |
| ARA (20:4- $\omega$ 6)  | 0.0054**                                  | 0.0132*                                                | 0.0255*                                         | 0.0074**                                          |
| EPA (20:5- $\omega$ 3)  | 0.8910                                    | 0.9312                                                 | 0.2620                                          | 0.2084                                            |
| DHA (22:6- $\omega$ 3)  | 0.0013**                                  | 0.5126                                                 | 0.0247*                                         | 0.0775                                            |
| 9t-18:1                 | 0.0559                                    | 0.3476                                                 | 0.3419                                          | 0.2811                                            |
| mt-ARA                  | 0.4831                                    | 0.5594                                                 | 0.0040**                                        | 0.0124*                                           |

Statistically significant samples: \* <0.05, \*\*<0.01

**Table S8.** The *p* values of fatty acid families and lipid indexes obtained from the comparison between brain tissues of control SCID and tumor-bearing SCID mice at 4 weeks and 17 weeks after conducting unpaired t-test (see Table 3).

| <b>FA family /<br/>Indexes</b> | <b>control<br/>4w vs. control<br/>17w</b> | <b>tumor-bearing<br/>4w vs. tumor-<br/>bearing 17w</b> | <b>control<br/>4w vs. tumor-<br/>bearing 4w</b> | <b>control<br/>17w vs. tumor-<br/>bearing 17w</b> |
|--------------------------------|-------------------------------------------|--------------------------------------------------------|-------------------------------------------------|---------------------------------------------------|
| SFA                            | 0.0051**                                  | 0.0112*                                                | 0.4351                                          | 0.8360                                            |
| MUFA                           | 0.0915                                    | 0.5059                                                 | 0.0530                                          | 0.0013**                                          |
| PUFA $\omega$ -6               | 0.0053**                                  | 0.0152*                                                | 0.0285*                                         | 0.0073**                                          |
| PUFA $\omega$ -3               | 0.0535                                    | 0.3787                                                 | 0.1189                                          | 0.2918                                            |
| PUFA                           | 0.0031**                                  | 0.0081**                                               | 0.0211*                                         | 0.0030**                                          |
| TFA                            | 0.9467                                    | 0.7872                                                 | 0.0013**                                        | 0.0038**                                          |
| SFA/MUFA                       | 0.9088                                    | 0.7917                                                 | 0.0821                                          | 0.0029**                                          |
| SFA/PUFA                       | 0.0037**                                  | 0.0036**                                               | 0.0308*                                         | 0.0091**                                          |
| $\omega$ -6/ $\omega$ -3       | 0.9505                                    | 0.0891                                                 | 0.7773                                          | 0.0532                                            |
| Unsaturated Index (UI)         | 0.0017**                                  | 0.0020**                                               | 0.0195*                                         | 0.0065**                                          |
| Peroxidation Index (PI)        | 0.0028**                                  | 0.0053**                                               | 0.0227*                                         | 0.0019**                                          |

Statistically significant samples: \* <0.05 , \*\*<0.01

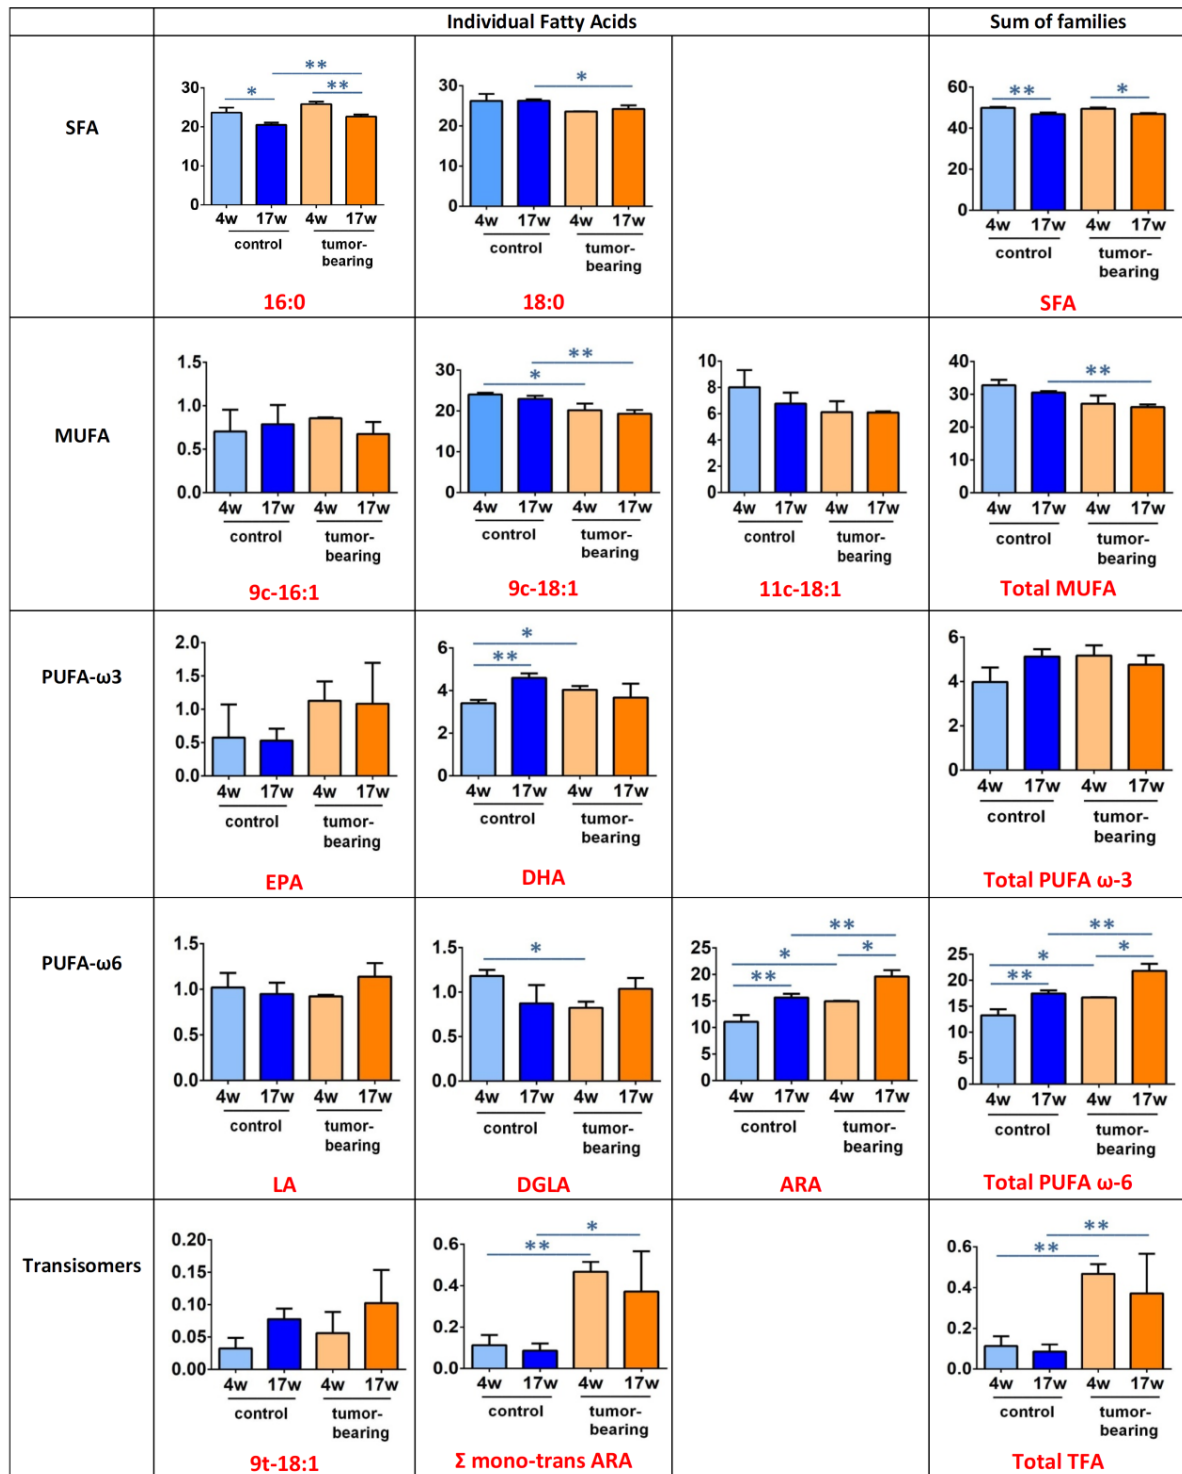

**Figure S2.** Percentage differences for each type of fatty acid in the brain tissue among control SCID mice and tumor-bearing SCID mice at 4 weeks and 17 weeks of age. The values are given as mean  $\pm$  SD ( $n=3$ ). Each member of the fatty acid family is given in a row, the last column being the sum of the corresponding fatty acid family. \* ( $p < 0.05$ ), \*\* ( $p < 0.01$ ); For specific values see Tables 2, 3, S7 and S8.

**Table S9.** Relative percentages (% rel) of fatty acid methyl esters (FAME), total FAME per family and lipid indexes obtained from brain tissue of normal mice at different age points (4 weeks and 17 weeks). <sup>1</sup> *p* value represents the comparison between 4-weeks and 17-weeks normal mice after conducting unpaired t-test.<sup>2</sup>

| <b>FAME</b>    | <b>FA family /<br/>Indexes</b> | <b>normal (4w)</b> | <b>normal (17w)</b> | <b><i>p</i> value</b> |
|----------------|--------------------------------|--------------------|---------------------|-----------------------|
| 16:0           |                                | 26.34 ±0.19        | 28.50 ±0.40         | 0.0011**              |
| 18:0           |                                | 24.81 ±0.22        | 24.40 ±1.52         | 0.6712                |
| 9c-16:1        |                                | 0.71 ±0.09         | 0.80 ±0.15          | 0.3977                |
| 9c-18:1        |                                | 21.48 ±1.80        | 19.96 ±0.54         | 0.2337                |
| 11c-18:1       |                                | 7.24 ±0.52         | 7.13 ±0.43          | 0.8065                |
| LNA (18:2-ω6)  |                                | 0.95 ±0.07         | 0.80 ±0.17          | 0.2347                |
| DGLA (20:3-ω6) |                                | 1.03 ±0.13         | 0.83 ±0.10          | 0.0985                |
| ARA (20:4-ω6)  |                                | 13.04 ±1.30        | 13.89 ±0.41         | 0.3395                |
| EPA (20:5-ω3)  |                                | 0.69 ±0.27         | 0.23 ±0.10          | 0.0040**              |
| DHA (22:6-ω3)  |                                | 3.45 ±0.26         | 3.35 ±0.14          | 0.5758                |
| 9t-18:1        |                                | 0.06 ±0.02         | 0.04 ±0.01          | 0.1138                |
| mt-ARA         |                                | 0.20 ±0.08         | 0.07 ±0.01          | 0.0533                |
|                | SFA                            | 51.15 ±0.15        | 52.90 ±1.18         | 0.0631                |
|                | MUFA                           | 29.42 ±1.98        | 27.89 ±1.09         | 0.3061                |
|                | PUFA ω-6                       | 15.02 ±1.37        | 15.52 ±0.33         | 0.5687                |
|                | PUFA ω-3                       | 4.14 ±0.46         | 3.58 ±0.24          | 0.0551                |
|                | PUFA                           | 19.16 ±1.76        | 19.10 ±0.15         | 0.9563                |
|                | TFA                            | 0.27 ±0.09         | 0.11 ±0.03          | 0.0417*               |
|                | SFA/MUFA                       | 1.74 ±0.12         | 1.90 ±0.12          | 0.1767                |
|                | SFA/PUFA                       | 2.68 ±0.25         | 2.77 ±0.08          | 0.6070                |
|                | ω-6/ω-3                        | 3.64 ±0.24         | 4.35 ±0.37          | 0.0480*               |
|                | Unsaturated Index (UI)         | 110.72 ±5.61       | 108.79 ±1.50        | 0.5945                |
|                | Peroxidation Index (PI)        | 87.65 ±8.05        | 86.89 ±0.57         | 0.8784                |

<sup>1</sup> The values are obtained from the GC analysis of FAME, derived from membrane phospholipids as reported in the experimental part. The numbers in the boxes represent the mean value (± standard deviation) of fatty acids from the measurement of three samples per group. <sup>2</sup> Statistically significant samples: \* <0.05, \*\*<0.01

**Table S10.** The *p* values of fatty acids, families and indexes obtained from the comparison between brain tissues of normal Swiss mice and control SCID mice (*p* values obtained from the data of Tables 2, 3 and S9).

| <b>FAME</b>             | <b>normal Swiss 4w vs.<br/>control SCID 4w</b> | <b>normal Swiss 17w vs.<br/>control SCID 17w</b> |
|-------------------------|------------------------------------------------|--------------------------------------------------|
| 16:0                    | ↓ , <i>p</i> =0.0633                           | ↓ , <i>p</i> =0.0009***                          |
| 18:0                    | ↑ , <i>p</i> =0.3241                           | ↑ , <i>p</i> =0.2356                             |
| 9c-16:1                 | ↑ , <i>p</i> =0.9783                           | ↑ , <i>p</i> =0.9295                             |
| 9c-18:1                 | ↑ , <i>p</i> =0.1820                           | ↑ , <i>p</i> =0.0567                             |
| 11c-18:1                | ↑ , <i>p</i> =0.5360                           | ↓ , <i>p</i> =0.3548                             |
| LA (18:2-ω6)            | ↑ , <i>p</i> =0.6410                           | ↑ , <i>p</i> =0.4397                             |
| DGLA (20:3-ω6)          | ↑ , <i>p</i> =0.3142                           | ↑ , <i>p</i> =0.8106                             |
| ARA (20:4-ω6)           | ↓ , <i>p</i> =0.1820                           | ↑ , <i>p</i> =0.0797                             |
| EPA (20:5-ω3)           | ↓ , <i>p</i> =0.8173                           | ↑ , <i>p</i> =0.1465                             |
| DHA (22:6-ω3)           | ↓ , <i>p</i> =0.8476                           | ↑ , <i>p</i> =0.0072**                           |
| 9t-18:1                 | ↓ , <i>p</i> =0.0221*                          | ↑ , <i>p</i> =0.5782                             |
| mt-ARA                  | ↓ , <i>p</i> =0.0721                           | ↑ , <i>p</i> =0.3065                             |
| SFA                     | ↓ , <i>p</i> =0.0754                           | ↓ , <i>p</i> =0.0256*                            |
| MUFA                    | ↑ , <i>p</i> =0.2273                           | ↑ , <i>p</i> =0.0633                             |
| PUFA ω-6                | ↓ , <i>p</i> =0.2025                           | ↑ , <i>p</i> =0.0538                             |
| PUFA ω-3                | ↓ , <i>p</i> =0.8207                           | ↑ , <i>p</i> =0.0190*                            |
| PUFA                    | ↓ , <i>p</i> =0.3403                           | ↑ , <i>p</i> =0.0087**                           |
| TFA                     | ↓ , <i>p</i> =0.0562                           | ↑ , <i>p</i> =0.2724                             |
| SFA/MUFA                | ↓ , <i>p</i> =0.1912                           | ↓ , <i>p</i> =0.0442*                            |
| SFA/PUFA                | ↑ , <i>p</i> =0.4362                           | ↓ , <i>p</i> =0.0132*                            |
| ω-6/ω-3                 | ↓ , <i>p</i> =0.5059                           | ↓ , <i>p</i> =0.0775                             |
| Unsaturation Index (UI) | ↓ , <i>p</i> =0.4522                           | ↑ , <i>p</i> =0.0112*                            |
| Peroxidation Index (PI) | ↓ , <i>p</i> =0.3975                           | ↑ , <i>p</i> =0.0045**                           |

Statistically significant samples: \* <0.05, \*\*<0.01, \*\*\*<0.001



**Table S11.** cPu and 8-oxo-dA levels in the brain tissue of 4-weeks and 17-weeks of age of control SCID, tumor-bearing SCID and normal Swiss mice compared with previous tissue-specific patterns from the liver and kidney by isotope dilution liquid chromatography-tandem mass spectrometry.

| <b>Tissue</b>   | <b>control SCID</b> | <b>tumor-bearing SCID</b> | <b>Normal Swiss</b> | <b>Reference</b> |
|-----------------|---------------------|---------------------------|---------------------|------------------|
| <b>cPu</b>      |                     |                           |                     |                  |
| brain 4w        | 0.64±0.05           | 0.66±0.05                 | 0.63±0.07           | this study       |
| brain 17w       | 0.67±0.05           | 0.70±0.07                 | 0.62±0.06           | this study       |
| liver 4w        | 0.69±0.04           | 0.78±0.03                 | 0.54±0.08           | [37]             |
| liver 17w       | 0.71±0.04           | 1.04±0.04                 | 0.55±0.03           | [37]             |
| kidney 4w       | 0.67±0.03           | 0.70±0.05                 | 0.49±0.00           | [37]             |
| kidney 17w      | 0.67±0.03           | 0.90±0.07                 | 0.52±0.02           | [37]             |
| <b>8-oxo-dA</b> |                     |                           |                     |                  |
| brain 4w        | 0.20±0.04           | 0.20±0.01                 | 0.18±0.04           | this study       |
| brain 17w       | 0.20±0.05           | 0.22±0.05                 | 0.18±0.02           | this study       |
| liver 4w        | 0.21±0.01           | 0.27±0.04                 | 0.16±0.02           | [37]             |
| liver 17w       | 0.21±0.01           | 0.35±0.03                 | 0.18±0.00           | [37]             |
| kidney 4w       | 0.20±0.01           | 0.22±0.00                 | 0.13±0.01           | [37]             |
| kidney 17w      | 0.20±0.02           | 0.28±0.01                 | 0.16±0.02           | [37]             |

**Table S12.** The *p* values for cPu and 8-oxo-dA lesions obtained from Table S11.

|                                        | <b>Brain</b> | <b>Liver [37]</b> | <b>Kidney [37]</b> |
|----------------------------------------|--------------|-------------------|--------------------|
| <b>cPu</b>                             |              |                   |                    |
| control 4w vs. control 17w             | 0.0633       | 0.8071            | 0.9626             |
| tumor-bearing 4w vs. tumor-bearing 17w | 0.4808       | 0.0704            | 0.0395*            |
| control 4w vs. tumor-bearing 4w        | 0.1422       | 0.1484            | 0.3263             |
| control 17w vs. tumor-bearing 17w      | 0.4914       | 0.0014**          | 0.0365*            |
| <b>8-oxo-dA</b>                        |              |                   |                    |
| control 4w vs. control 17w             | 0.9740       | 0.6768            | 0.9123             |
| tumor-bearing 4w vs. tumor-bearing 17w | 0.7445       | 0.0570            | 0.022*             |
| control 4w vs. tumor-bearing 4w        | 0.6828       | 0.293             | 0.065              |
| control 17w vs. tumor-bearing 17w      | 0.6194       | 0.012*            | 0.003**            |

Statistically significant samples: \* <0.05 , \*\*<0.01
